# Supplementary material for: Psychological Stress Is Associated with Increased Cancer Risk in Dogs
Source: MDPI journal article supplement (doi:10.3390/ani13111869), 2023-06-03
Supplement: s1 [file s1]

## Supplementary material

| Breeds included                | Mast Cell<br>(Śmiech et al. 2018)<br>N=2,763 | Lymphoma<br>(Edwards et al. 2003)<br>N=83,589 | Lymphoma<br>(Yau et al. 2017)<br>N=7,067 | Osteosarcoma<br>(Edmunds et al. 2021)<br>N=444,473 | Osteosarcoma<br>(Ru, Terracini, and Glickman 1998)<br>N=4,364 | Osteosarcoma<br>(Sapierzyński and Czopowicz 2017)<br>N=2,604 | Melanoma<br>(Gillard et al. 2014)<br>N=15,805 |
|--------------------------------|----------------------------------------------|-----------------------------------------------|------------------------------------------|----------------------------------------------------|---------------------------------------------------------------|--------------------------------------------------------------|-----------------------------------------------|
| Akita                          |                                              |                                               |                                          |                                                    |                                                               |                                                              |                                               |
| Alaskan Malamute               |                                              |                                               |                                          |                                                    |                                                               |                                                              |                                               |
| American Bulldog               |                                              |                                               |                                          |                                                    |                                                               |                                                              |                                               |
| American Staffordshire Terrier |                                              |                                               |                                          |                                                    |                                                               |                                                              |                                               |
| Australian Cattle Dog          |                                              |                                               |                                          |                                                    |                                                               |                                                              |                                               |
| Beagle                         |                                              |                                               |                                          |                                                    |                                                               |                                                              |                                               |
| Beauceron                      |                                              |                                               |                                          |                                                    |                                                               |                                                              |                                               |
| Bernese Mountain Dog           |                                              |                                               |                                          |                                                    |                                                               |                                                              |                                               |
| Bichon Frise                   |                                              |                                               |                                          |                                                    |                                                               |                                                              |                                               |
| Border Collie                  |                                              |                                               |                                          |                                                    |                                                               |                                                              |                                               |
| Border Terrier                 |                                              |                                               |                                          |                                                    |                                                               |                                                              |                                               |
| Boxer                          |                                              |                                               |                                          |                                                    |                                                               |                                                              |                                               |
| Bulldog                        |                                              |                                               |                                          |                                                    |                                                               |                                                              |                                               |
| Bullmastiff                    |                                              |                                               |                                          |                                                    |                                                               |                                                              |                                               |
| Bull Terrier                   |                                              |                                               |                                          |                                                    |                                                               |                                                              |                                               |
| Cairn Terrier                  |                                              |                                               |                                          |                                                    |                                                               |                                                              |                                               |
| Cane Corso                     |                                              |                                               |                                          |                                                    |                                                               |                                                              |                                               |
| Caucasian Shepherd Dog         |                                              |                                               |                                          |                                                    |                                                               |                                                              |                                               |
| Cavalier King Charles Spaniel  |                                              |                                               |                                          |                                                    |                                                               |                                                              |                                               |
| English Cocker Spaniel         |                                              |                                               |                                          |                                                    |                                                               |                                                              |                                               |
| Collie                         |                                              |                                               |                                          |                                                    |                                                               |                                                              |                                               |
| Dachshund                      |                                              |                                               |                                          |                                                    |                                                               |                                                              |                                               |
| Dalmatian                      |                                              |                                               |                                          |                                                    |                                                               |                                                              |                                               |
| Doberman Pinscher              |                                              |                                               |                                          |                                                    |                                                               |                                                              |                                               |
| Dogue de Bordeaux              |                                              |                                               |                                          |                                                    |                                                               |                                                              |                                               |
| English Springer Spaniel       |                                              |                                               |                                          |                                                    |                                                               |                                                              |                                               |
| Fox Hound                      |                                              |                                               |                                          |                                                    |                                                               |                                                              |                                               |
| Fox Terrier                    |                                              |                                               |                                          |                                                    |                                                               |                                                              |                                               |
| French Bulldog                 |                                              |                                               |                                          |                                                    |                                                               |                                                              |                                               |
| German Shepherd Dog            |                                              |                                               |                                          |                                                    |                                                               |                                                              |                                               |
| Giant Schnauzer                |                                              |                                               |                                          |                                                    |                                                               |                                                              |                                               |
| Golden Retriever               |                                              |                                               |                                          |                                                    |                                                               |                                                              |                                               |

|                            |  |  |  |  |  |  |  |
|----------------------------|--|--|--|--|--|--|--|
| Great Dane                 |  |  |  |  |  |  |  |
| Greyhound                  |  |  |  |  |  |  |  |
| Hungarian Vizla            |  |  |  |  |  |  |  |
| Irish Setter               |  |  |  |  |  |  |  |
| Irish Terrier              |  |  |  |  |  |  |  |
| Irish Wolfhound            |  |  |  |  |  |  |  |
| Jack Russell Terrier       |  |  |  |  |  |  |  |
| Keeshond                   |  |  |  |  |  |  |  |
| Kelpie                     |  |  |  |  |  |  |  |
| Labradoodle                |  |  |  |  |  |  |  |
| Labrador Retriever         |  |  |  |  |  |  |  |
| Lurcher                    |  |  |  |  |  |  |  |
| Maltese                    |  |  |  |  |  |  |  |
| Miniature Fox Terrier      |  |  |  |  |  |  |  |
| Miniature Poodle           |  |  |  |  |  |  |  |
| Miniature Schnauzer        |  |  |  |  |  |  |  |
| Old English Shepherd Dog   |  |  |  |  |  |  |  |
| German Shorthaired Pointer |  |  |  |  |  |  |  |
| Polish Tatra Sheepdog      |  |  |  |  |  |  |  |
| Pug                        |  |  |  |  |  |  |  |
| Rhodesian Ridgeback        |  |  |  |  |  |  |  |
| Rottweiler                 |  |  |  |  |  |  |  |
| Standard Schnauzer         |  |  |  |  |  |  |  |
| Scottish Terrier           |  |  |  |  |  |  |  |
| Shar-Pei                   |  |  |  |  |  |  |  |
| Shetland Shepherd Dog      |  |  |  |  |  |  |  |
| Shih Tzu                   |  |  |  |  |  |  |  |
| Siberian Husky             |  |  |  |  |  |  |  |
| Silky Terrier              |  |  |  |  |  |  |  |
| Staffordshire Bull Terrier |  |  |  |  |  |  |  |
| Saint Bernard              |  |  |  |  |  |  |  |
| Standard Poodle            |  |  |  |  |  |  |  |
| Tibetan Terrier            |  |  |  |  |  |  |  |
| Weimaraner                 |  |  |  |  |  |  |  |
| West Highland Terrier      |  |  |  |  |  |  |  |
| Whippet                    |  |  |  |  |  |  |  |
| Yorkshire Terrier          |  |  |  |  |  |  |  |

## References

Edmunds, Grace L., Matthew J. Smalley, Sam Beck, Rachel J. Errington, Sara Gould, Helen Winter, Dave C. Brodbelt, and Dan G. O'Neill. 2021. "Dog Breeds and Body Conformations with Predisposition to Osteosarcoma in the UK: A Case-Control Study." *Canine Medicine and Genetics* 8 (1): 2. <https://doi.org/10.1186/s40575-021-00100-7>.

- Edwards, D S, W E Henley, E F Harding, J M Dobson, and J L N Wood. 2003. "Breed Incidence of Lymphoma in a UK Population of Insured Dogs." *Veterinary and Comparative Oncology* 1 (4): 200–206. <https://doi.org/https://doi.org/10.1111/j.1476-5810.2003.00025.x>.
- Gillard, Marc, Edouard Cadieu, Clotilde De Brito, Jérôme Abadie, Béatrice Vergier, Patrick Devauchelle, Frédérique Degorce, et al. 2014. "Naturally Occurring Melanomas in Dogs as Models for Non-UV Pathways of Human Melanomas." *Pigment Cell & Melanoma Research* 27 (1): 90–102. <https://doi.org/10.1111/pcmr.12170>.
- Ru, G, B Terracini, and L T Glickman. 1998. "Host Related Risk Factors for Canine Osteosarcoma." *The Veterinary Journal* 156 (1): 31–39. [https://doi.org/https://doi.org/10.1016/S1090-0233\(98\)80059-2](https://doi.org/https://doi.org/10.1016/S1090-0233(98)80059-2).
- Sapierzyński, R., and M. Czopowicz. 2017. "The Animal-Dependent Risk Factors in Canine Osteosarcomas." *Polish Journal of Veterinary Sciences* 20 (2): 293–98. <https://doi.org/10.1515/pjvs-2017-0035>.
- Śmiech, Anna, Brygida Ślaska, Wojciech Łopuszyński, Agnieszka Jasik, Diana Bochyńska, and Roman Dąbrowski. 2018. "Epidemiological Assessment of the Risk of Canine Mast Cell Tumours Based on the Kiupel Two-Grade Malignancy Classification." *Acta Veterinaria Scandinavica* 60 (1): 70. <https://doi.org/10.1186/s13028-018-0424-2>.
- Yau, P P Y, N K Dhand, P C Thomson, and R M Taylor. 2017. "Retrospective Study on the Occurrence of Canine Lymphoma and Associated Breed Risks in a Population of Dogs in NSW (2001–2009)." *Australian Veterinary Journal* 95 (5): 149–55. <https://doi.org/https://doi.org/10.1111/avj.12576>.
